1  
2  
3  
4  
5  
6  
7  
8  
9  
10  
11  
12  
13  
14  
15  
16  
17  
18  
19  
20

## **Generalized harmonic analysis reveals a frequency modulated timer regulates mammalian hibernation**

Shingo Gibo<sup>1</sup>, Yoshifumi Yamaguchi<sup>2,3,4,\*</sup>, and Gen Kurosawa<sup>1,\*</sup>

<sup>1</sup>RIKEN Interdisciplinary Theoretical and Mathematical Sciences Program (iTHEMS); Wako, 351-0198, Japan

<sup>2</sup>Institute of Low Temperature Science, Hokkaido University; Kita-19, Nishi-8, Kita-ku, Sapporo, 060-0819, Japan

<sup>3</sup>Global Station for Biosurfaces and Drug Discovery, Global Institution for Collaborative Research and Education (GI-CoRE), Hokkaido University; Kita-12, Nishi-6, Kita-ku, Sapporo 060-0812, Japan.

<sup>4</sup>Inamori Research Institute for Science Fellowship (InaRIS); 620 Suiginya-cho, Shimogyo-ku, Kyoto 600-8411, Japan.

\*Corresponding authors. Emails: [g.kurosawa@riken.jp](mailto:g.kurosawa@riken.jp); [bunbun@lowtem.hokudai.ac.jp](mailto:bunbun@lowtem.hokudai.ac.jp).

## 21 **Abstract**

22 Mammalian hibernators decrease basal metabolism and body temperature (Tb) to minimize  
23 energy expenditure in harsh seasons. During hibernation, Tb drops to low temperature  
24 ( $<10\text{ }^{\circ}\text{C}$ ) and remains constant for days, known as deep torpor. Spontaneous interbout  
25 arousals interrupt torpor bouts, when Tb recovers to euthermic state  $\sim 37\text{ }^{\circ}\text{C}$ . Torpor-interbout  
26 arousal event repeats during hibernation. Little is known about mechanisms governing Tb  
27 fluctuation during hibernation. Here, we analyzed Tb fluctuation across Syrian hamsters'  
28 hibernation cycle using generalized harmonic analysis and discovered a model with  
29 frequency modulation quantitatively reproducing Tb fluctuation. This analysis identified that  
30 an unexpectedly longer period of 120–430 days modulates period of several days, generating  
31 Tb fluctuation. We propose that concerted action of two endogenous periods governs torpor-  
32 interbout arousal cycles during hibernation.

33

## 34 **Introduction**

35 Hibernation is a strategy for organisms to survive in the environment with limited food and  
36 water availability<sup>1,2</sup>. During a season with little or no food, small mammalian hibernators  
37 drastically decrease their basal metabolism and core body temperature (Tb) to  $10\text{ }^{\circ}\text{C}$  and  
38 become immobile. This hypometabolic, hypothermic, and immobile state is called deep  
39 torpor. Interbout arousal (IBA) interrupt deep torpor, during which Tb rapidly arise to  
40 euthermic state. Thus, during hibernation period, Tb does not remain constant at neither low  
41 nor high values but shows fluctuation between euthermia and hypothermia with an interval of  
42 several days. This multiday-scale-phenomena, known as torpor-IBA cycles, is a conserved  
43 property of hibernation across mammalian hibernators.

44 IBA is also called periodic arousal<sup>3</sup>, for patterns of Tb fluctuation in the middle of  
45 hibernation season attempted one to find certain periodicity in torpor-IBA cycles. However,  
46 length of torpor bout gradually changes in the early and late period of hibernation even under  
47 a constant condition in a laboratory, casting questions whether the torpor-IBA cycle is explicitly  
48 defined as “periodic” and what biological processes are behind it. Several hypotheses have  
49 long been proposed to explain the regulation and significance of the torpor-IBA cycle<sup>4</sup>. There  
50 are two non-mutually exclusive hypotheses currently proposed. First is that the timing of IBA  
51 is regulated by accumulation or consumption of certain proteins, protein modifications, or  
52 metabolites during torpor period. And the second one is that its timing is a reflection of certain  
53 innate endogenous rhythm(s) in the animal, such as circadian or circannual rhythms<sup>5</sup>. In nature  
54 and human societies, some systems exhibit a gradual change in the period of oscillations<sup>6</sup>. For  
55 instance, timing of sleep onset for some non-24 h patients with sleep-wake disorder is delayed  
56 every day and fluctuates several times a month<sup>7</sup>. Theoretically, this phenomenon can be  
57 understood as the desynchrony between circadian rhythms and 24 h environmental cycles;  
58 however, it has not been tested whether such desynchronization is responsible for producing  
59 Tb patterns during hibernation. Now that recent technology development enables to monitor

60 Tb for more than hundred days with high precision, quantitative analysis and  
61 phenomenological modeling of Tb time-series data can be used to address the principle  
62 governing hibernation.

63 The frequency change in biological time series is often quantified by short-time Fourier  
64 transform (STFT) and Wavelet transform. In STFT, the time series, which is multiplied by short  
65 interval window function, is analyzed, instead of analyzing the original time series. In Wavelet  
66 transform, the basis function is localized in time and frequency, called Wavelet function, which  
67 is distinct from trigonometric function. These two methods have been widely accepted in the  
68 field of time-series analysis. However, it is often difficult for the two methods to estimate the  
69 period of the signal within short time intervals (such as analyzing the patterns of Tb fluctuation  
70 during hibernation that can be used to uncover certain periodicity in torpor-IBA cycles) because  
71 of the fundamental tradeoff between time and frequency resolutions. To circumvent this  
72 problem, Generalized Harmonic Analysis (GHA), a methodology usually applied to acoustics  
73 for characterization of irregularities in music or circadian rhythms, can be applied to Tb  
74 fluctuation during hibernation. In contrast to STSF and Wavelet transforms, GHA is  
75 advantageous because it simply fits the data by the summation of trigonometric functions based  
76 on least square, and there is no trade-off between time and frequency resolutions.

77 Mammalian hibernators are roughly classified into two types: (i) obligate (or strongly  
78 seasonal) and (ii) facultative (or opportunistic) types<sup>1,8</sup>. Obligate hibernators, such as ground  
79 squirrels, marmots, and bears, undergo fall transition and enter hibernation spontaneously even  
80 without environmental cues<sup>9-11</sup>. For example, 13-lined ground squirrels and chipmunks exhibit  
81 hibernation iteratively with a period of ~1 year under conditions of constant cold and  
82 continuous darkness<sup>12,13</sup>. These lines of evidence suggest that endogenous circannual rhythms  
83 underlie hibernation in these species, although mechanisms for the circannual rhythms are  
84 unknown. In contrast, facultative hibernators, such as Syrian hamsters (*Mesocricetus auratus*),  
85 enter hibernation at any time of year, at least in a laboratory condition, when they are exposed  
86 to cold and short photoperiodic conditions<sup>14,15</sup>. Consistent with the successful induction of  
87 hibernation irrespective of seasons in appropriate laboratory conditions, little evidence has  
88 been found so far that circannual control of hibernation exists in this species. Nevertheless, this  
89 species awakens from hibernation without any external factors<sup>14,15</sup>, implying the existence of  
90 mechanisms for estimation of the hibernation length. However, few clues about this  
91 phenomenon exist, not only at molecular level but also the underlying mathematical principle  
92 in both obligate and facultative hibernators.

93 In this study, we performed theoretical analysis of Tb across hibernation cycle (>50  
94 days) in Syrian hamsters<sup>15</sup>. Typically, the Tb time series during hibernation is noisy and  
95 fluctuates irregularly, which complicates analysis. Therefore, to uncover temporal changes of  
96 torpor-IBA cycle, we used GHA, a methodology usually employed for acoustics for  
97 characterization of irregularity in music.

98

## 99 **Results**

### 100 **Generalized Harmonic Analysis of changes of dominant period behind torpor-IBA cycle**

101 To find rules for Tb fluctuation during hibernation, we applied GHA to analyze Tb from 13  
102 hibernating Syrian hamsters<sup>15</sup> (Fig. 1a, b, Supplementary Fig. 1). GHA enables us to accurately  
103 quantify periodic components underlying several torpor-IBA cycles (Fig. 1c-f) and determine  
104 the strongest periodic component (Fig. 1g, h), the so-called dominant frequency (“Methods”<sup>16</sup>).  
105 Because the torpor-IBA cycles take several days (Fig. 1a-c), we extracted dominant frequency  
106 of the torpor-IBA cycles ranging from 0.1 to 0.3 per day (Fig. 1e, f), which corresponds to 3.3–  
107 10 days dominant period calculated as the inverse of the dominant frequency (Fig. 1g, h) to  
108 reveal the temporal changes of periodic components during hibernation. The extracted  
109 dominant periods underlying Tb time series were 3.5–8.5 days during the first 16 days after the  
110 onset of first torpor bout and 4.5–8.0 days during 68–84 days. This GHA analysis quantitatively  
111 revealed that dominant period of torpor-IBA cycle gradually changed (Fig. 1i, j). The dominant  
112 period increases or decreases over time during hibernation depending on the individual  
113 (Supplementary Fig. 2). To compare patterns of Tb time series, we quantified the change of  
114 torpor-IBA cycle period at the initial 0–48 days of hibernation using linear regression  
115 (“Methods”, Fig. 1k, l, Supplementary Fig. 2). For 12 of 13 individuals (except #3 in  
116 Supplementary Fig. 2), the slope of regressed line was positive, and its average was 0.0087 per  
117 day, which indicates that the period of torpor-IBA cycle increased 0.87% per day on average  
118 with time during the initial 0–48 days (Fig. 1m). Particularly, for five of thirteen individuals,  
119 who hibernated for more than 120 days (#1, 2, and #8–10), the dominant period of torpor-IBA  
120 cycle initially increased and decreased later toward the end of hibernation (Fig. 1g-l,  
121 Supplementary Fig. 2i, l-n, p, q). Although one of thirteen individuals (#3) exhibited strongly  
122 fluctuated Tb pattern and its slope of the linear regression was negative, it was due to the  
123 occurrence of shallow/daily torpor and long IBA during first 20 days of hibernation because  
124 the dominant period of torpor-IBA cycle exhibited an increasing tendency thereafter  
125 (Supplementary Fig. 1a, Supplementary Fig. 2a, d). Taken together, this analysis demonstrated  
126 that the period of torpor-IBA cycle changes at hundreds-days scale, suggesting that it is  
127 possibly governed by as-yet-unknown physiological temporal process.

128

### 129 **In search for a model reproducing the pattern of torpor-arousal cycles**

130 To understand biological processes behind gradual change of the torpor-IBA cycle, we tested  
131 two theoretical models that possibly reproduce the experimental data, (a) frequency modulation  
132 model (FM) and (b) desynchrony model (Fig. 2a, b). FM assumes that the shorter frequency  
133 (period) may be modulated by another slower frequency (longer period). Its typical example is  
134 FM radio exhibiting gradual change in period over time<sup>17</sup>, although few biological processes  
135 other than auditory and vocalization systems were proposed to exhibit such features. In contrast,  
136 the desynchrony model assumes that one period, torpor-IBA cycle period in this case, changes  
137 over time due to the failure of synchronization with another period. A typical example of this

138 is desynchronization of internal circadian rhythm and external photoperiod (Fig. 2a, b,  
139 “Methods”).

140 By varying the parameters in both models, we first investigated which model would  
141 better reproduce the observed Tb fluctuation using maximum likelihood estimation. The FM  
142 model with the best parameter set, yielding maximum likelihood, reproduced most of the  
143 timing for the transitions between deep torpor and IBA for all individual data (Fig. 2c, d). In  
144 contrast, the desynchrony model did not reproduce most transitions between deep torpor and  
145 IBA for some individuals (Fig. 2g, h). Indeed, likelihood values of the FM model with the best  
146 parameter set were always larger for each individual’s data than those of the desynchrony  
147 model, suggesting that the FM model is the more proper model for reproducing Tb fluctuation  
148 of Syrian hamsters during hibernation (Fig. 2k, Supplementary Fig. 3, Supplementary Fig. 4 in  
149 detail).

150 We next evaluated the agreement between theoretical models and Tb experimental  
151 data by other statistical method, the so-called “Itakura–Saito (IS) divergence.” IS divergence  
152 may be a better statistical method to identify the model and its parameter set that reproduces  
153 the timing of IBA than widely-used maximum likelihood estimation<sup>18</sup> from the following  
154 points; IS divergence, originally a speech recognition method for mixed sound, has axial  
155 asymmetry while the Euclidean distance has axial symmetry. Thus, IS divergence imposes  
156 more penalties if the value of the model is smaller than that of experimental data<sup>19</sup>. Indeed, FM  
157 model with the best parameter set, yielding minimum IS divergence, reproduced most of the  
158 timing of IBAs (Fig. 2e, f, Supplementary Fig. 5). Quantification of the maximum likelihood  
159 estimation using IS divergence demonstrated that the FM model is much better than the  
160 desynchrony model in reproducing Tb fluctuation (Fig. 2l, for examples compare #5, #8, and  
161 #12 in Supplementary Fig. 5). For an individual wherein the desynchrony model showed a  
162 better score than the FM model (#3 in Fig. 2l), it was evident that FM model fits the Tb data  
163 much better than desynchrony model for the most part in the time series (Fig. 2f, j), suggesting  
164 that the judgment with IS divergence is inappropriate for the individual. Taken together, both  
165 maximum likelihood estimation and IS divergence statistically justified that the FM model is  
166 a proper model for reproducing periodic change of torpor-IBA cycles.

167

### 168 **Quantifying rhythms that underlie hibernation**

169 The above result indicates that the main property of Tb fluctuation during hibernation can be  
170 described by the two key parameters in the FM model, shorter ( $\text{day}/\omega_1$ ) and longer ( $\text{day}/\omega_2$ )  
171 period. In this model, shorter period is modulated by longer period ( $\omega_1 > \omega_2$ ). By determining  
172 the two periods with the theoretical model, we can now quantify and explain individual  
173 variation in complex patterns of Tb fluctuation. Because the dominant period estimated by  
174 GHA was 3.5–9 days and the longer period at the timescale of approximately 100–500 days,  
175 we first rigorously varied the shorter period at the timescale of approximately 1–10 days to  
176 precisely determine the two periods (see “Methods”). To this end, we compared estimations by

177 maximum likelihood and IS divergence as follows.

178         Based on the best maximum likelihood estimation values for the FM model that  
179 reproduced experimental data (Fig. 3a-c, Supplementary Fig. 4), we determined the faster and  
180 slower period ( $\omega_1$  and  $\omega_2$ ); the shorter period of the FM model, yielding the maximum  
181 likelihood estimation, was between 4.0 and 9.2 days, which covers the dominant period  
182 extracted by GHA (Fig. 3d). Meanwhile, the estimated longer period was between 119 and 430  
183 days (Fig. 3d). Conversely, when the parameter set of the FM model was chosen by IS  
184 divergence, the distribution of the shorter period of the FM model (day/ $\omega_1$ ) was narrower such  
185 that it was between 3.9 and 6.5 days (Fig. 3e). The longer period by IS divergence (day/ $\omega_2$ )  
186 was also between 115 and 430 days (Fig. 3e). Therefore, there was a discrepancy between the  
187 maximum likelihood and IS divergence estimation. It was probably because the FM model  
188 yielding the maximum likelihood estimation did not reproduce shallow/daily torpor of some  
189 individuals, whereas the FM model yielding minimum IS divergence did reproduce them (see  
190 #5 and #7 in Supplementary Fig. 3, Supplementary Fig. 5). Taken together, analysis with the  
191 FM model enabled us to quantify a period of several days and another longer period of 115–  
192 430 days that modulates the former period during hibernation.

193

#### 194 **Forecasting body temperature fluctuation during hibernation**

195 The validity of the FM model for Tb fluctuation can be assessed by its predictability. To test  
196 this, we estimated the two parameters (day/ $\omega_1$  and  $\omega_2$ ) from three-quarters (Fig. 4a, b) of the  
197 whole time series of Tb data for each individual's data by the FM model using IS divergence  
198 (Fig. 4, Supplementary Fig. 9, Supplementary Fig. 10) or maximum likelihood (Supplementary  
199 Fig. 7, Supplementary Fig. 8). Simulation with the parameters predicted the last quarter of the  
200 time series because the estimated shorter and longer period (day/ $\omega_1$  and day/ $\omega_2$ ) from the three-  
201 quarters of the Tb time series were close to those estimated from the whole time series (Fig.  
202 4a, b). When we simulated the FM model with the parameters estimated from the first half of  
203 the whole time series of the Tb data, it also predicted the first few cycles of the second half of  
204 the original whole Tb time series but gradually deviated from the original (Fig. 4c, v). Indeed,  
205 the longer periods (day/ $\omega_2$ ) predicted from the first half were distant from those estimated from  
206 the original whole Tb time series (Fig. 4e, g), implying that the estimation of the parameter  
207 needs sufficiently long experimental Tb time series (Fig. 4e, g). In contrast, when the shorter  
208 frequency ( $\omega_1$ ) was predicted from the first half of the whole time-series data, it ranged from  
209 3.4 to 5.9 days and was close to that estimated from the whole data (Fig. 4e, f). These results  
210 suggest that estimation of longer frequency ( $\omega_2$ ) is affected by and that of shorter frequency  
211 ( $\omega_1$ ) and is robust to the length of Tb time series used for statistical analysis.

212

#### 213 **Discussion**

214 In this study, we applied GHA to quantify the time series of Tb fluctuation during hibernation  
215 and defined theoretical models that reproduce it. This study demonstrates the effectiveness of

216 GHA to quantify Tb fluctuation, the patterns of which are complex and rich in variation among  
217 animals, and is an improvement over using STFT and Wavelet transform to explore and model  
218 Tb oscillations.

219 Through statistical analysis of the FM model and desynchrony model, we conclude  
220 that the FM model is better than the desynchrony model to realize the pattern of Tb fluctuation  
221 during hibernation of Syrian hamsters. To the best of our knowledge, only a few studies have  
222 applied FM to explain biological processes, such as circadian desynchronization in rats and  
223 changes in oscillatory frequency of brain waves in visual perception<sup>6,20</sup>. The FM model  
224 hypothesizes that the frequency of oscillation ( $\omega_1$ ) gradually changes over time with another  
225 longer frequency ( $\omega_2$ ). Our statistical analysis derives realistic values for  $\omega_1$  and  $\omega_2$ . The  
226 derived ranges of both values in the case of analysis with IS divergence were 3.9–6.5 day period  
227 for  $\omega_1$  and 115–430 day period for  $\omega_2$ , well within the 2–3 year lifespan of Syrian hamsters.  
228 This result raises the question of what biological processes are reflected in these values.

229 The faster frequency  $\omega_1$ , a period with a few days, could be responsible for  
230 determining the period of torpor-IBA cycles. In many small hibernators, length of each torpor  
231 bout gradually increases from the beginning, reaches its peak in the middle, and then decreases  
232 at the end of the hibernation season, even in constant ambient temperature conditions<sup>13,21-24</sup>.  
233 Ambient and core body temperatures also affect duration of each deep torpor bout, suggesting  
234 involvement of a temperature-sensitive process in the regulation of torpor-IBA cycles<sup>13,25-27</sup>.  
235 Metabolic rate contributes to the determination of torpor-IBA timings to only a minor extent  
236 (about 30%) in golden-mantled ground squirrels<sup>26</sup>. The exact process responsible for  
237 determination of torpor-IBA timing is not yet clear. Most chemical reactions are temperature-  
238 sensitive. It should be noted that the temperature-sensitive nature of torpor-IBA cycle is  
239 apparently different from temperature-compensation of circadian rhythm<sup>28,29</sup>. In fact, several  
240 studies suggested that clock genes involved in circadian rhythm have little or small contribution  
241 to determining timing of deep torpor-IBA cycles during hibernation<sup>30,31</sup>. These lines of  
242 evidence suggest that mechanisms other than circadian rhythm governed by transcription-  
243 translation feedback loop underlying the timing of torpor onset and arousal during hibernation.  
244  $\omega_1$  may correspond to the period generated by such mechanisms. In contrast, timing of  
245 shallow/daily torpor, an adaptive response to winter condition or food shortage, during which  
246 basal metabolisms and Tb drops for a shorter period, typically several hours and within a day,  
247 is related to circadian rhythm in some species, including Djungarian hamster (*Phodopus*  
248 *sungorus*), which exhibits seasonal shallow/daily torpor, and mice entering fasting-induced  
249 torpor<sup>10,27,30-33</sup>. Thus, the situation is still complex and further research is needed to determine  
250 whether  $\omega_1$  is sensitive to ambient temperature during hibernation.

251 Another frequency  $\omega_2$ , a period of a few hundred days, implies endogenous circannual  
252 rhythm. Although we recognize the limitation of our study that our model does not integrate  
253 the timing of the start and end of the hibernation period, it is surprising that only Tb time-series  
254 data during hibernation period could derive such a long period. In some species including

255 mammalian hibernators and migratory birds, the circannual rhythm is regulated by unknown  
256 endogenous mechanisms independent of environmental triggers, such as photoperiod and  
257 ambient temperature<sup>13,34</sup>. Ground squirrels kept in a constant condition change their body  
258 weight and exhibit torpor phenotypes in a circannual cycle<sup>13,35,36</sup>. Additionally, recordings over  
259 several years in ground squirrels or eastern chipmunks kept under constant photoperiods and  
260 cold temperatures demonstrated that the periods from the onset of hibernation to that in next  
261 year range from 5 months to 16 months or 5 months to 13 months in those animals,  
262 respectively<sup>12,13,35,36</sup>. Thus, the endogenous period underlying circannual phenomena could  
263 vary among individuals, implying that coordination of the endogenous circannual period with  
264 phenological changes would be necessary for proper adaptation to animal habitat. Although  
265 Syrian hamsters are facultative hibernators that do not depend on or may not have an  
266 endogenous circannual rhythm, they spontaneously quit hibernation after several months of  
267 hibernation period under a constant cold and photoperiodic condition. This strongly suggests  
268 that Syrian hamsters have an unknown endogenous timer for measuring the length of  
269 hibernation. In fact, a phenomenon called refractoriness has long been known in Siberian and  
270 Syrian hamsters<sup>37-39</sup>. The hamsters regress or regrow their gonads in response to chronic short  
271 or long photoperiod, respectively. But if the animals were kept further in short or long  
272 photoperiod conditions for several months after the gonadal regression, the gonads then start  
273 to regrow or regress without any environmental changes, suggesting the existence of yet-  
274 unidentified endogenous timer measuring seasonal length in hamsters. Thus,  $\omega_2$  may  
275 correspond to possible endogenous period governed by such an endogenous timer.

276 We anticipate that our theoretical analysis of Tb fluctuation can be a starting point for  
277 quantitative comparison of hibernation patterns across close and distantly related hibernating  
278 species exhibiting various Tb patterns. Furthermore, quantification across two or more  
279 consecutive hibernation seasons may allow prediction of the timing of torpor and IBA and will  
280 also foster the understanding of molecular mechanism of hibernation by searching for  
281 biological processes that operate within those periods.



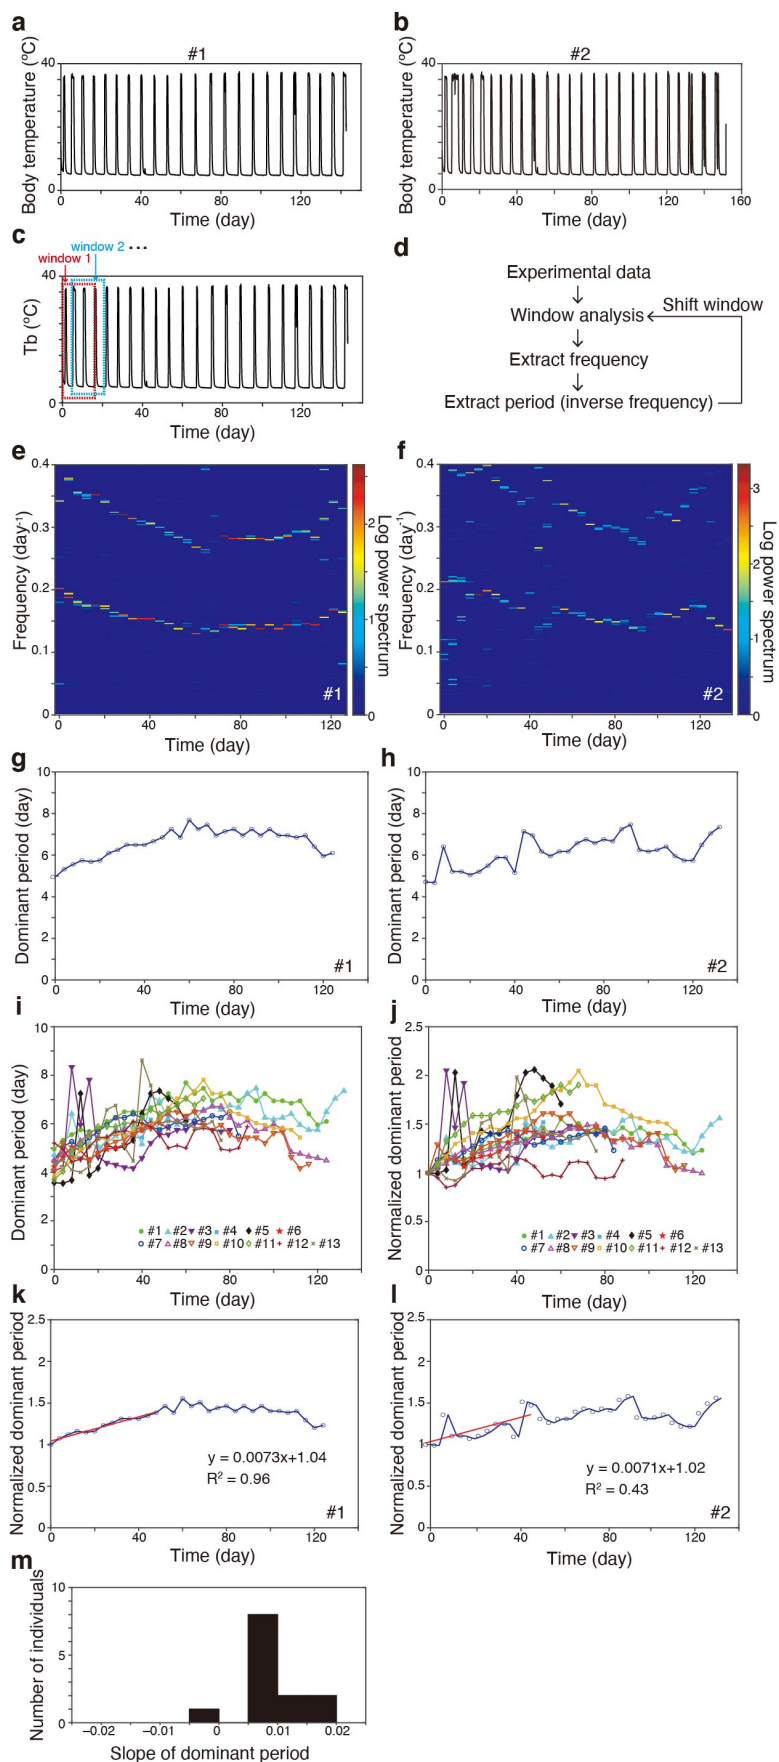

282

283 **Fig. 1. GHA analysis quantifies change of periods in Tb fluctuation during hibernation.**

284 (a, b) Time series of Tb fluctuation during hibernation under a short day and cold

285 temperature (8L:16D cycle, ambient temperature = 4 °C). Two representative hibernating  
 286 Syrian hamsters (from n = 13) are shown in Fig. 1a, b (see also Supplementary Fig. 1 for data  
 287 of the others). (c, d) Scheme of GHA analysis for Tb data (see text). (e, f) Sequence of  
 288 estimated frequency by analysis of data from two representative individuals during  
 289 hibernation (#1, 2). The heatmaps show the magnitude of spectrogram as logarithmic  
 290 compression of power defined by  $\log(1 + |\text{amplitude}|^2)$ . (g-i) Estimated dominant period (i.e.,  
 291 day/frequency) for #1 (g), #2 (h), and all 13 individual hamsters (i) changed over time. (j-l)  
 292 Dominant periods normalized by the initial dominant period. (k, l) The change of dominant  
 293 period for individuals #1 and #2 at 0–48 days was quantified using liner regression. (m)  
 294 Distribution of quantified slopes of regression line per day for the change in normalized  
 295 dominant period.

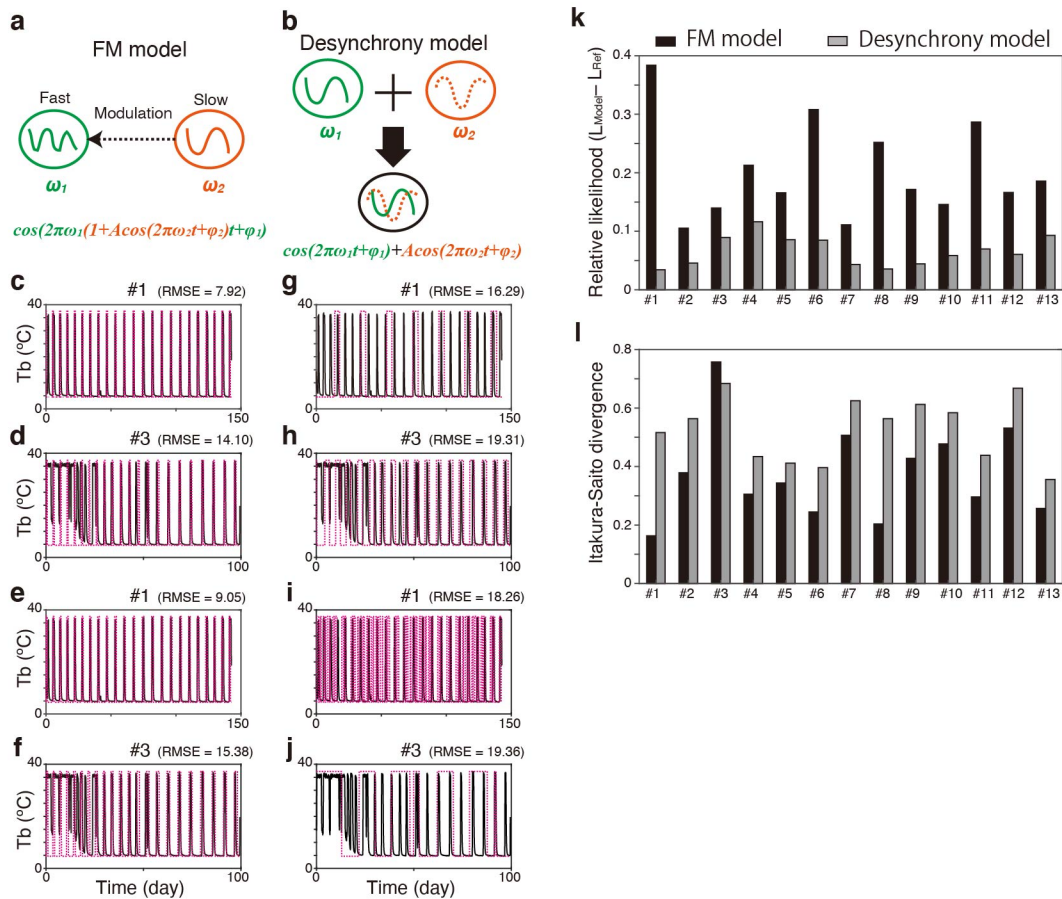

297  
 298 **Fig. 2. Determine a model reproducing the torpor-IBA cycles of Syrian hamster. (a, b)**  
 299 Schematic representation of the proposed FM model (a) and desynchrony model (b) with  
 300 multiple frequencies of  $\omega_1$  and  $\omega_2$ . (c-i) Comparison of simulation done by the two models.  
 301 (c-f) FM model simulation (red) with the best parameter set for Tb time series recorded in  
 302 two representative animals (black, #1, 3). The best parameter was chosen by maximum  
 303 likelihood estimation (c, d) and IS divergence (e, f). RMSE is the value of root mean squared  
 304 error. (g-j) Desynchrony model simulation (red) with the best parameter set for the Tb data  
 305 from the same animals used for FM simulation (#1, 3). The best parameter was chosen by

306 maximum likelihood estimation (**g, h**) or IS divergence (**i, j**). (**k, l**) Maximum likelihood  
 307 estimation comparison of the two models to realize each individual time series (#1–13).  
 308 Likelihood of FM (black) and desynchrony model (gray) was compared using maximum  
 309 likelihood estimation (**k**) and IS divergence (**l**). Time series of fixed minimum of Tb was set  
 310 as the reference model. Note that as the model becomes closer to the experimental data,  
 311 maximum likelihood estimation becomes larger and IS divergence becomes smaller.  
 312

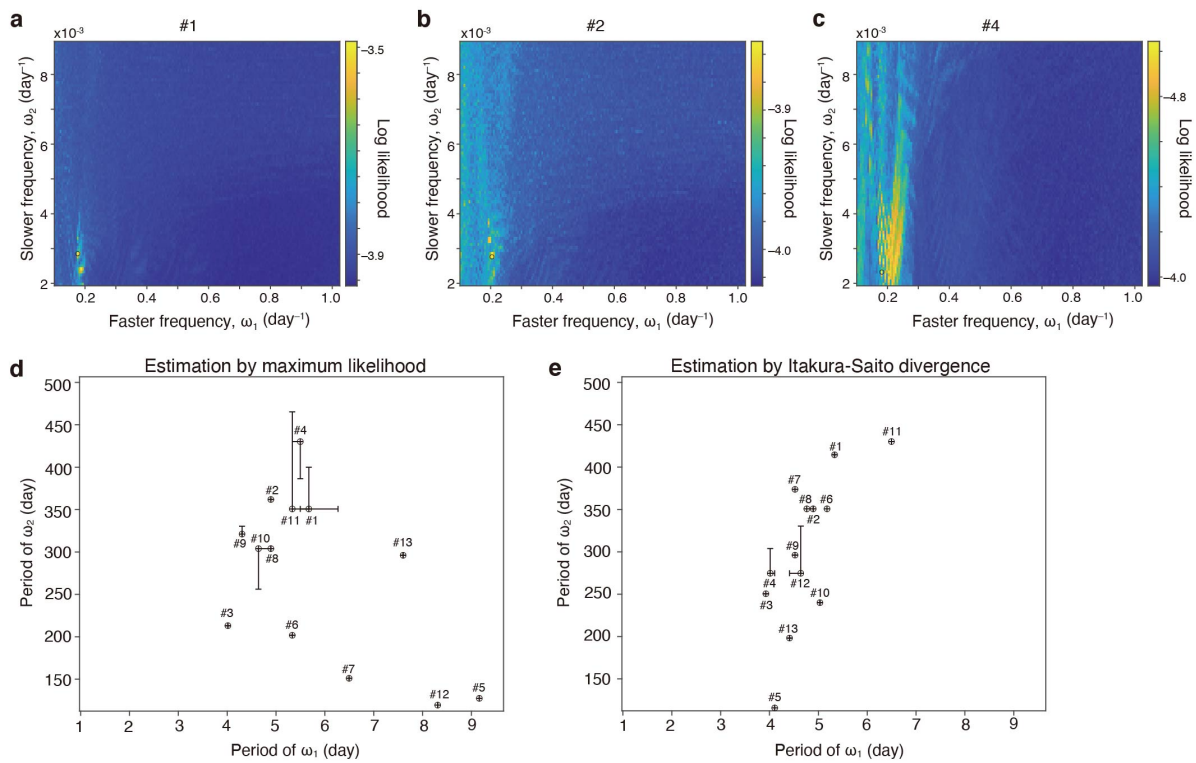

313  
 314 **Fig. 3. Quantification of rhythms behind hibernation.** (a-c) Distribution of likelihood  
 315 values for the set of faster and slower period ( $\omega_1$  and  $\omega_2$  in FM model) underlying Tb  
 316 fluctuation was estimated by maximum likelihood. (d, e) Individual variation in the set of  
 317 faster and slower period estimated using maximum likelihood (d) and IS divergence (e).  
 318

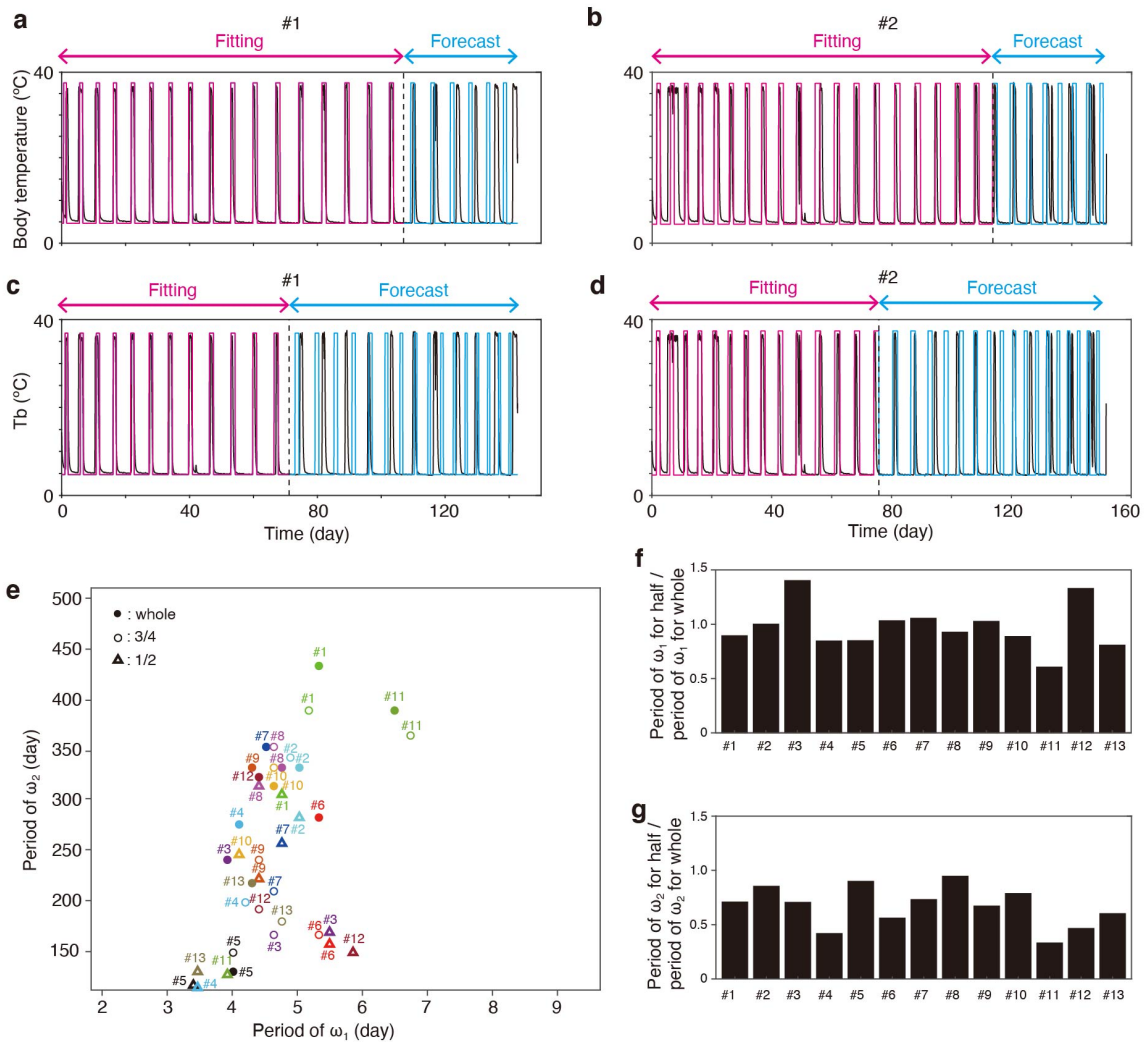

319

320

321

322

323

324

325

**Fig. 4. Forecasting Tb fluctuation during hibernation.** Tb time series was reconstructed (magenta) and predicted (cyan) using the three-quarters (a, b) and the first half (c, d) of the whole time series of original Tb data in animals (black). (e) Predicted faster and slower period ( $\omega_1$  and  $\omega_2$  in FM model) using partial time series based on IS divergence estimation. (f) The ratio of  $\omega_1$  period for half time series to that for whole time series. (g) The ratio of  $\omega_2$  period for half time series to that for whole time series.

## 326 **Methods**

### 327 **Animal housing and Tb measurement**

328 Animal housing and Tb measurement were done as described previously<sup>15</sup>. Briefly, female  
329 Syrian hamsters (*Mesocricetus auratus*) were purchased from SLC, Inc., Japan and reared  
330 under LD-Warm conditions (light condition = 16L:8D cycle, lights on 05:00–21:00, ambient  
331 temperature = 24–25°C) until most animals weighed over 100–120 g. Then the animals were  
332 subjected to surgical operation under inhalation anesthesia with 4% isoflurane (DS Pharma  
333 Animal Health, Japan) and intraperitoneal injection of pentobarbital sodium (65 mg/kg, diluted  
334 with phosphate-buffered saline; Kyoritu Seiyaku, Japan) for intraperitoneally implanting core  
335 body temperature (Tb) loggers (iButton®, Maxim Integrated, USA, #DS1992 L-F5 model)  
336 coated with rubber (Plasti Dip, Performix®). After one to two weeks of recovery, animals were  
337 transferred to SD-Cold conditions (8L:16D cycle, lights on 10:00–18:00, ambient temperature  
338 = 5°C) for hibernation induction. Animals were individually housed in polypropylene cages,  
339 and the Tb of animals were measured every 90 min with an accuracy of 0.5°C. The cage  
340 replacement was done every two weeks and skipped when animals were hibernating at deep  
341 torpor to avoid disturbing it. The Tb loggers were recovered from animals sacrificed by  
342 decapitation after they were subjected to 10–15 min anesthesia with intraperitoneal injection  
343 of pentobarbital sodium (65 mg/kg) and inhalation of 4% isoflurane.

344

### 345 **Proposed theoretical models for Tb fluctuation**

346 To simulate Tb fluctuation, we tested two models, frequency modulation and desynchrony  
347 models. In the FM model, Tb during hibernation is expressed by the following equation:

$$348 \quad S[\cos(2\pi\omega_1(1 + A_2 \cos(2\pi\omega_2 t + \phi_2)))t + \phi_1] \quad (1)$$

349 wherein oscillation with frequency of oscillation ( $\omega_1$ ) is assumed to change over time with  
350 frequency ( $\omega_2$ ). (b) In the desynchrony model, Tb is expressed as

$$351 \quad S[\cos(2\pi\omega_1 t + \phi_1) + A_2 \cos(2\pi\omega_2 t + \phi_2)]. \quad (2)$$

352 Although the desynchrony model can yield synchronous limit cycle oscillation when  
353  $\omega_1 = \omega_2$ , it also yields quasiperiodic oscillations for certain parameter choices with  $\omega_1 \neq \omega_2$ .  
354 Step function  $S$  was used in both models, which realize sharp change in Tb time series. Function  
355  $S[x]$  is defined as  $S[x] = \text{maximum value of Tb if } x > \theta$  and  $S[x] = \text{minimum value of Tb}$   
356 otherwise. In search of the models and parameters that reproduce each data, all the parameters  
357 were rigorously varied (variation is detailed in Supplementary Tables 1, 2).

358

### 359 **Quantification of body temperature fluctuation**

360 GHA was conducted as previously described for the studies of music and circadian rhythms<sup>16,40</sup>.  
361 GHA is a method in signal processing to quantify periodic components within a certain  
362 frequency range, so-called “dominant period” by estimating the most fitted summation of  
363 trigonometric functions for given time series<sup>16</sup>. The changes of torpor-IBA period over time  
364 were quantified by (1) setting a time window; (2) estimating dominant torpor frequency of each

365 time window by using GHA; (3) shifting time window by 4 days; and (4) repeating (2) and (3)  
366 until the end of time series. Here, the time-window length was set to be 16 days so that it is  
367 sufficient for covering 2–3 cycles of DT-PA cycles. In the experiment, 13 individual Syrian  
368 golden hamsters continued to hibernate under laboratory conditions for more than 50 days. In  
369 this analysis, the onset of hibernation is defined to be the point such that  $T_b$  is lower than 15 °C.  
370 Time series of body temperature within the time window of 16 days for the 13 hamsters is  
371 modeled as

$$372 \quad \sum_{j=1}^{j_{\max}} \{a_j \cos(2\pi f_j t) + b_j \sin(2\pi f_j t)\} \quad (3)$$

373 where  $f_j$  is the frequency and  $a_j$  and  $b_j$  are the amplitudes. The resolution of frequency was  
374 1/500 per day, and  $j_{\max}$  is the maximum number of frequency component, which was set to be  
375 4000 (i.e.,  $f_{\max} = 8$  /day). The frequency, called dominant frequency (text) and the amplitude  
376 within each time window were quantified by repeatedly minimizing the square residuals:

$$377 \quad \int_0^L [x(t) - \sum_{j=1}^{j_{\max}} \{a_j \cos(2\pi f_j t) + b_j \sin(2\pi f_j t)\}]^2 dt \quad (4)$$

378 where  $L$  is time-window length. Then, the estimated dominant period during hibernation, which  
379 is the inverse of the dominant frequency was plotted over time (Fig. 1).

380 After quantifying changes in the dominant period of torpor-IBA cycle during  
381 hibernation, the change in the dominant period during the initial 0–48 days of hibernation was  
382 specifically measured by linear regression. The positive (negative) slope of the regression line  
383 indicates that the period of torpor-IBA cycle increases (decreases) with time.

384

### 385 **Statistical analysis for model and parameter selection**

386 In search of theoretical models and their parameters reproducing the experimental  $T_b$  data  
387 during hibernation, we used the following two statistical quantities: maximum likelihood and  
388 Itakura–Saito divergence (IS), defined as follows, respectively:

$$389 \quad \text{Log likelihood} = -\frac{N}{2} \log(2\pi\sigma^2) - \frac{1}{2\sigma^2} \sum_{t=1}^N (x(t) - x_{\text{model}}(t))^2, \quad (5)$$

$$390 \quad \text{IS divergence} = \sum_{t=1}^N \left( \frac{x(t)}{x_{\text{model}}(t)} - \log\left(\frac{x(t)}{x_{\text{model}}(t)}\right) - 1 \right), \quad (6)$$

391 where  $x(t)$  is original time series,  $x_{\text{model}}(t)$  is time series of model,  $N$  is length of time series,  
392 and  $\sigma^2$  is variance of  $x(t) - x_{\text{model}}(t)$ . Analysis using IS divergence was conducted as previously  
393 described in the field of speech recognition<sup>18</sup>. In fact, IS divergence is small when the model  
394 reproduces the timing of periodic arousal of experimental data.

395 To find the best model and the best parameter for each model to reproduce the  
396 experimental data, we varied parameters as shown in Supplementary Tables 1 and 2. When  
397 maximum likelihood becomes larger, IS divergence becomes smaller; the model becomes  
398 closer to the experimental data. The best parameter for each model to reproduce the  
399 experimental data was computationally identified. Maximum likelihood and IS divergence of

400 each model using the best parameter is shown for each individual's data in Fig. 2k, l. There  
401 was a discrepancy between maximum likelihood and IS divergence estimation. This is because  
402 maximum likelihood often imposes more penalties than IS divergence does if the difference of  
403  $x(t)$  and  $x_{\text{model}}(t)$  is large; maximum likelihood assumes that the difference of  $x(t)$  and  $x_{\text{model}}(t)$   
404 follows normal distribution while IS divergence assumes that it follows asymmetrical  
405 distribution.

406 To obtain the precise values of  $\omega_1$  and  $\omega_2$  in FM model, the best parameter was  
407 searched within a narrow range of  $\omega_1$  and  $\omega_2$ , after it was searched within various parameter  
408 values (Table 1). Also, in the analysis of prediction of Tb fluctuation (Fig. 4), the lower limit  
409 of  $\omega_1$  was set to be 0.5358 /days (1.83 days) for computation cost because the likelihood of  
410 the model with the period around 24h was always small.

411

412

### 413 **Acknowledgments**

414 We thank Y. Chayama and H. Taii for their help in collecting Tb data; R. Enoki, E.  
415 Gracheva, and Y. Kawahara for comments on the manuscript; and A. Mochizuki for  
416 encouragement. We would like to thank Enago for the English language review. This work  
417 was supported by grants from Japan Science and Technology Agency (JPMJCR1913 to  
418 G.K.), and from the Japanese Society for the Promotion of Science, and the Ministry of  
419 Education, Culture, Sports, Science, and Technology in Japan (JP20H05766 to Y.Y. and  
420 JP21K06105 to G.K.), Toray Science Foundation (to Y.Y.), the Takeda Science Foundation  
421 (to Y.Y.), and Inamori Foundation (to Y.Y.).

422

### 423 **Authors contribution**

424 G.K., Y.Y, and S.G. designed the work and wrote the manuscript. Y.Y. collected Tb data, and  
425 S.G. and G.K. developed theoretical models and analyzed the data.

426

### 427 **Competing interests**

428 The authors declare no competing interests.

429

### 430 **Data availability**

431 Original time-series data are presented in Fig.1, Supplementary Fig. 1. All other data are  
432 available upon reasonable request to the corresponding authors G.K. and Y.Y.

433

### 434 **Code availability**

435 All code are available upon reasonable request to the corresponding authors G.K. and Y.Y.

436

437 **References**

- 438 1. Geiser, F. Hibernation. *Curr. Biol.* **23**, R188-R193 (2013).
- 439 2. Mohr, S.M., Bagriantsev, S.N. & Gracheva, E.O. Cellular, Molecular, and Physiological  
440 Adaptations of Hibernation: The Solution to Environmental Challenges. *Annu. Rev. Cell*  
441 *and Dev. Biol.* **36**, 315-338 (2020).
- 442 3. Lyman, C.P., Willis, J.S., Malan, A. & Wang, L.C.H. *Hibernation and Torpor in Mammals*  
443 *and Birds*. (Academic Press, 1982).
- 444 4. Andrews, M.T. Molecular interactions underpinning the phenotype of hibernation in  
445 mammals. *J. Exp. Biol.* **222**, jeb160606 (2019).
- 446 5. Hampton M. & Andrews M.T. A simple molecular mathematical model of mammalian  
447 hibernation. *J Theor Biol* **247**:297-302 (2007).
- 448 6. Granada, A.E., Cambras, T., Díez-Noguera, A. & Hanspeter, H. Circadian  
449 desynchronization. *Interface Focus* **1**, 153-166 (2011).
- 450 7. Uchiyama, M., Okawa, M., Ozaki, S., Shirakawa, S. & Takahashi, K. Delayed phase jumps  
451 of sleep onset in a patient with non-24-hour sleep-wake syndrome. *Sleep* **19**, 637-640  
452 (1996).
- 453 8. Giroud, S. et al. The Torpid State: Recent advances in metabolic adaptations and Protective  
454 Mechanisms. *Front. Physiol.* **11**, 623665 (2021).
- 455 9. Zucker, I. Pineal gland influences period of circannual rhythms of ground squirrels. *Am. J.*  
456 *Physiol.* **249**, R111-R115 (1985).
- 457 10. Körtner, G. & Geiser, F. The temporal organization of daily torpor and hibernation:  
458 circadian and circannual rhythms. *Chronobiol. Int* **17**, 103-128 (2000).
- 459 11. Schwartz, C. & Andrews, M.T. Circannual transitions in gene expression: lessons from  
460 seasonal adaptations. *Curr. Top. Dev. Biol.* **105**, 247-273 (2013).
- 461 12. Kondo, N. et al. Circannual control of hibernation by HP complex in the brain. *Cell* **125**,  
462 161-72 (2006).
- 463 13. MacCannell, A.D.V. & Staples, J.F. Elevated ambient temperature accelerates aspects of  
464 torpor phenology in an obligate hibernator. *J. Therm. Biol.* **96**, 102839 (2021).
- 465 14. Janský, L., Haddad G., Kahlerová, Z. & Nedoma, J. Effect of external hibernation of golden  
466 hamsters. *J. Comp. Physiol.* **154**, 427-433 (1984).
- 467 15. Chayama, Y., Ando, L., Tamura, Y., Miura, M. & Yamaguchi, Y. Decreases in body  
468 temperature and body mass constitute pre-hibernation remodeling in the Syrian golden  
469 hamster, a facultative mammalian hibernator. *R. Soc. Open Sci.* **3**, 160002 (2016).
- 470 16. Terada, T., Nakajima, H., Tohyama, M. & Hirata, Y. Nonstationary waveform analysis and  
471 synthesis using generalized harmonic analysis. In *Proceeding of the IEEE-SP International*  
472 *Symposium on Time-Frequency and Time-Scale Analysis* (IEEE), 429-432 (1994).
- 473 17. Armstrong, E.H. Frequency modulation multiplex system. *United States Patent Office*  
474 2,630,497 (1953).



- 475 18. Itakura, K. & Saito, S. Analysis synthesis telephony based on the maximum likelihood  
476 method. *In Proc 6<sup>th</sup> International Congress on Acoustics C17-C20* (1968).
- 477 19. Hashimoto, N., Nakano, S., Yamamoto, K. & Nakagawa, S. Speech recognition based on  
478 Itakura-Saito divergence and dynamics / sparseness constraints from mixed sound of  
479 speech and music by non-negative matrix factorization. *In Interspeech-2014 2749-2753*  
480 (2014).
- 481 20. Wutz, A., Melcher, D. & Samaha, J. Frequency modulation of neural oscillations according  
482 to visual task demands. *Proc. Natl. Acad. Sci. USA* **115**, 1346-1351 (2018).
- 483 21. Ortmann, S. & Heldmaier, G. Regulation of body temperature and energy requirements of  
484 hibernating Alpine marmots (*Marmota marmota*). *Am. J. Physiol. Regul. Integr. Comp.*  
485 *Physiol.* **278**, R698-704 (2000).
- 486 22. Arnold, W., Ruf, T., Frey-Roos, F. & Bruns, U. Diet-independent remodeling of cellular  
487 membranes precedes seasonally changing body temperature in a hibernator. *PLoS One* **6**,  
488 e18641 (2011).
- 489 23. Sheriff, M.J., Richter, M.M., Buck, C.L. & Barnes, B.M. Changing seasonality and  
490 phenological responses of free-living male arctic ground squirrels: the importance of sex.  
491 *Phylos. Trans. R. Soc. Lond. B Biol. Sci.* **368**, 20120480 (2013).
- 492 24. Siutz, C., Valent, M., Ammann, V., Niebauer, A. & Milesi, E. Sex-specific effects of food  
493 supplementation on hibernation performance and reproductive timing in free-ranging  
494 common hamsters. *Sci. Rep.* **8**, 13082 (2018).
- 495 25. Twente, J.W. & Twente, J.A. Regulation of hibernating periods by temperature. *Proc. Natl.*  
496 *Acad. Sci. USA* **54**, 1058-1061 (1965).
- 497 26. Geiser, F. & Kenagy, G.J. Torpor duration in relation to temperature and metabolism in  
498 hibernating ground squirrels. *Physiol. Zool.* **61**, 442-449 (1988).
- 499 27. Malan, A., Ciocca, D., Challet, E. & Pévet, P. Implicating a temperature-dependent clock  
500 in the regulation of torpor bout duration in classic hibernation. *J. Biol. Rhythms* **33**, 626-  
501 636 (2018).
- 502 28. Pittendrigh, C.S. On temperature independence in the clock system controlling emergence  
503 time in *Drosophila*. *Proc. Natl. Acad. Sci. USA* **40**, 1018-1029 (1954).
- 504 29. Kurosawa, G., Fujioka, A., Koinuma, S., Mochizuki, A. & Shigeyoshi, Y. Temperature—  
505 amplitude coupling for stable biological rhythms at different temperatures. *PLoS Comput.*  
506 *Biol.* **13**, e1005501 (2017).
- 507 30. Oklejewicz, M., Daan, S. & Strijkstra, A.M. Temporal organisation of hibernation in wild-  
508 type and tau mutant Syrian hamsters. *J. Comp. Physiol. B* **171**, 431-439 (2001).
- 509 31. van der Vinne, V., Bingaman, M.J., Weaver, D.R. & Swoap, S.J. Clocks and meals keep  
510 mice from being cool. *J. Exp. Biol.* **221**, jeb179812 (2018).
- 511 32. Kirsch, R., Ouarour, A. & Pévet, P. Daily torpor in the Djungarian hamster (*Phodopus*  
512 *sungorus*): photoperiodic regulation, characteristics and circadian organization. *J. Comp.*  
513 *Physiol.* **168**, 121-128 (1991).

- 514 33. Ruf, T. & Geiser, F. Daily torpor and hibernation in birds and mammals. *Biol. Rev. Camb.*  
515 *Philos. Soc.* **90**, 891–926 (2015).
- 516 34. Gwinner, E. Circannual rhythms in birds. *Curr. Opin. Neurobiol.* **13**, 770-778 (2003).
- 517 35. Mrosovsky, N. Hibernation and the Hypothalamus. In: *Hibernation and the*  
518 *Hypothalamus*. Neuroscience Series. (Springer, 1971).
- 519 36. Pengelley, E.T., Aloia, R.C. & Barnes, B.M. Circannual rhythmicity in the hibernating  
520 ground squirrel *Citellus lateralis* under constant light and hyperthermic ambient  
521 temperature. *Comp. Biochem. Physiol. A Physiol.* **61**, 599-603 (1978).
- 522 37. Carr, A.J.F. et al. Photoperiod differentially regulates circadian oscillators in central and  
523 peripheral tissues of the syrian hamster. *Curr. Biol.* **13**, 1543–1548 (2003).
- 524 38. Johnston, J.D. et al. Evidence for an endogenous per1- and ICER-independent seasonal  
525 timer in the hamster pituitary gland. *FASEB J.* **17**, 810–815 (2003).
- 526 39. Herwig, A. et al. Hypothalamic ventricular ependymal thyroid hormone deiodinases are  
527 an important element of circannual timing in the Siberian hamster (*Phodopus sungorus*).  
528 *PLoS ONE* **8**, e62003 (2013).
- 529 40. Gibo, S. & Kurosawa, G. Theoretical study on the regulation of circadian rhythms by  
530 RNA methylation. *J. Theor. Biol.* **490**, 110140 (2020).

531

### 532 **Supplementary Information**

533 Supplementary Figs. 1 to 10

534 Supplementary Tables 1 to 2
